# Supplementary material for: Defining the ethical considerations surrounding kidney transplantation for frail and cognitively impaired patients: a Delphi study of geriatric transplant experts
Source: Springer Nature journal article supplement (doi:10.1186/s12877-022-03209-x), 2022-07-08
Supplement: MOESM1 [file 23251424]

**Table S1.** Factors to consider for transplant evaluation of a patient who is unlikely to outlive the graft.

| Factors                                  | Round 1                                                |     | Round 2                              |     |
|------------------------------------------|--------------------------------------------------------|-----|--------------------------------------|-----|
|                                          | Factor that would cause participant to list patient, n | %   | Rated very important or important, n | %   |
| Health-related quality of life           | 19                                                     | 76% | 19                                   | 95% |
| Younger age                              | 18                                                     | 72% | 17                                   | 85% |
| Benefit over dialysis to patient         | *                                                      | *   | 15                                   | 75% |
| Symptoms on dialysis                     | 13                                                     | 52% | 12                                   | 60% |
| Social support                           | 9                                                      | 36% | 10                                   | 50% |
| Dependence in activities of daily living | 7                                                      | 28% | 8                                    | 40% |
| Medication Adherence                     | 6                                                      | 24% | **                                   | **  |
| Race/Ethnicity                           | 1                                                      | 4%  | **                                   | **  |
| Sex                                      | 0                                                      | 0   | **                                   | **  |

\*New factor that was suggested by  $\geq 2$  experts in round 1, then subsequently included in round 2

\*\* Experts were not asked to rate factors in round 2 that were rated very important/important by  $< 25\%$  in round 1

**Table S2.** Factors to consider for transplant evaluation of a patient who is 65 years or older.

| Factors                                  | Round 1                                                |     | Round 2                              |      |
|------------------------------------------|--------------------------------------------------------|-----|--------------------------------------|------|
|                                          | Factor that would cause participant to list patient, n | %   | Rated very important or important, n | %    |
| Good social support                      | 18                                                     | 72% | 20                                   | 100% |
| Medication adherence                     | 16                                                     | 64% | 20                                   | 100% |
| Good functional status                   | *                                                      | *   | 20                                   | 100% |
| Health-related quality of life           | 19                                                     | 76% | 19                                   | 95%  |
| Low or no frailty                        | *                                                      | *   | 19                                   | 95%  |
| No medical contraindications             | *                                                      | *   | 19                                   | 95%  |
| Low comorbidity burden                   | *                                                      | *   | 16                                   | 80%  |
| Symptoms on dialysis                     | 11                                                     | 44% | 10                                   | 50%  |
| Dependence in activities of daily living | 7                                                      | 28% | 7                                    | 35%  |
| Race/Ethnicity                           | 1                                                      | 4%  | **                                   | **   |
| Sex                                      | 0                                                      | 0   | **                                   | **   |

\*New factor that was suggested by  $\geq 2$  experts in round 1, then subsequently included in round 2

\*\* Experts were not asked to rate factors in round 2 that were rated very important/important by  $< 25\%$  in round 1

**Table S3.** Factors to consider for transplant evaluation of a patient who is frail.

| Factor                                                              | Round 1                                                |     | Round 2                              |     |
|---------------------------------------------------------------------|--------------------------------------------------------|-----|--------------------------------------|-----|
|                                                                     | Factor that would cause participant to list patient, n | %   | Rated very important or important, n | %   |
| Social support                                                      | 13                                                     | 52% | 19                                   | 95% |
| Frailty could be reversible or improved (from transplant or prehab) | *                                                      | *   | 19                                   | 95% |
| Likelihood for success or benefit from surgery                      | *                                                      | *   | 19                                   | 95% |
| Younger age                                                         | 16                                                     | 64% | 18                                   | 90% |
| No medical contraindications                                        | *                                                      | *   | 18                                   | 90% |
| Health-related quality of life                                      | 16                                                     | 64% | 17                                   | 85% |
| Symptoms on dialysis                                                | 12                                                     | 48% | 7                                    | 35% |
| Dependence in activities of daily living                            | 6                                                      | 24% | **                                   | **  |
| Race/Ethnicity                                                      | 0                                                      | 0   | **                                   | **  |
| Sex                                                                 | 0                                                      | 0   | **                                   | **  |

\*New factor that was suggested by  $\geq 2$  experts in round 1, then subsequently included in round 2

\*\* Experts were not asked to rate factors in round 2 that were rated very important/important by  $< 25\%$  in round 1

**Table S4.** Factors to consider for transplant evaluation of a patient who is cognitively impaired.

| Factor                                                                                     | Round 1                                                |     | Round 2                              |      |
|--------------------------------------------------------------------------------------------|--------------------------------------------------------|-----|--------------------------------------|------|
|                                                                                            | Factor that would cause participant to list patient, n | %   | Rated very important or important, n | %    |
| Social support                                                                             | 18                                                     | 72% | 20                                   | 100% |
| Health-related quality of life                                                             | 15                                                     | 60% | 19                                   | 95%  |
| Degree of cognitive impairment (e.g. mild vs. dementia)                                    | *                                                      | *   | 19                                   | 95%  |
| Medication adherence                                                                       | *                                                      | *   | 19                                   | 95%  |
| Cognitive impairment related to ESRD/HD symptoms and not a primary neurocognitive disorder | *                                                      | *   | 15                                   | 75%  |
| Younger age                                                                                | 10                                                     | 40% | 14                                   | 70%  |
| Dependence in activities of daily living                                                   | 3                                                      | 12% | **                                   | **   |
| Race/Ethnicity                                                                             | 0                                                      | 0   | **                                   | **   |
| Sex                                                                                        | 0                                                      | 0   | **                                   | **   |

\*New factor that was suggested by  $\geq 2$  experts in round 1, then subsequently included in round 2

\*\* Experts were not asked to rate factors in round 2 that were rated very important/important by  $< 25\%$  in round 1

**Figure S1.** Flowchart of factors introduced and removed at each round. Experts were asked to report which factors would cause them to list a patient for each scenario in round 1 and in round 2 were asked to rate the importance of each factor. The different scenarios were a) General transplant evaluation; b) Patient who is unlikely to outlive the graft; c) Patient who is 65 years or older; d) Patient who is frail; e) Patient who is cognitively impaired.

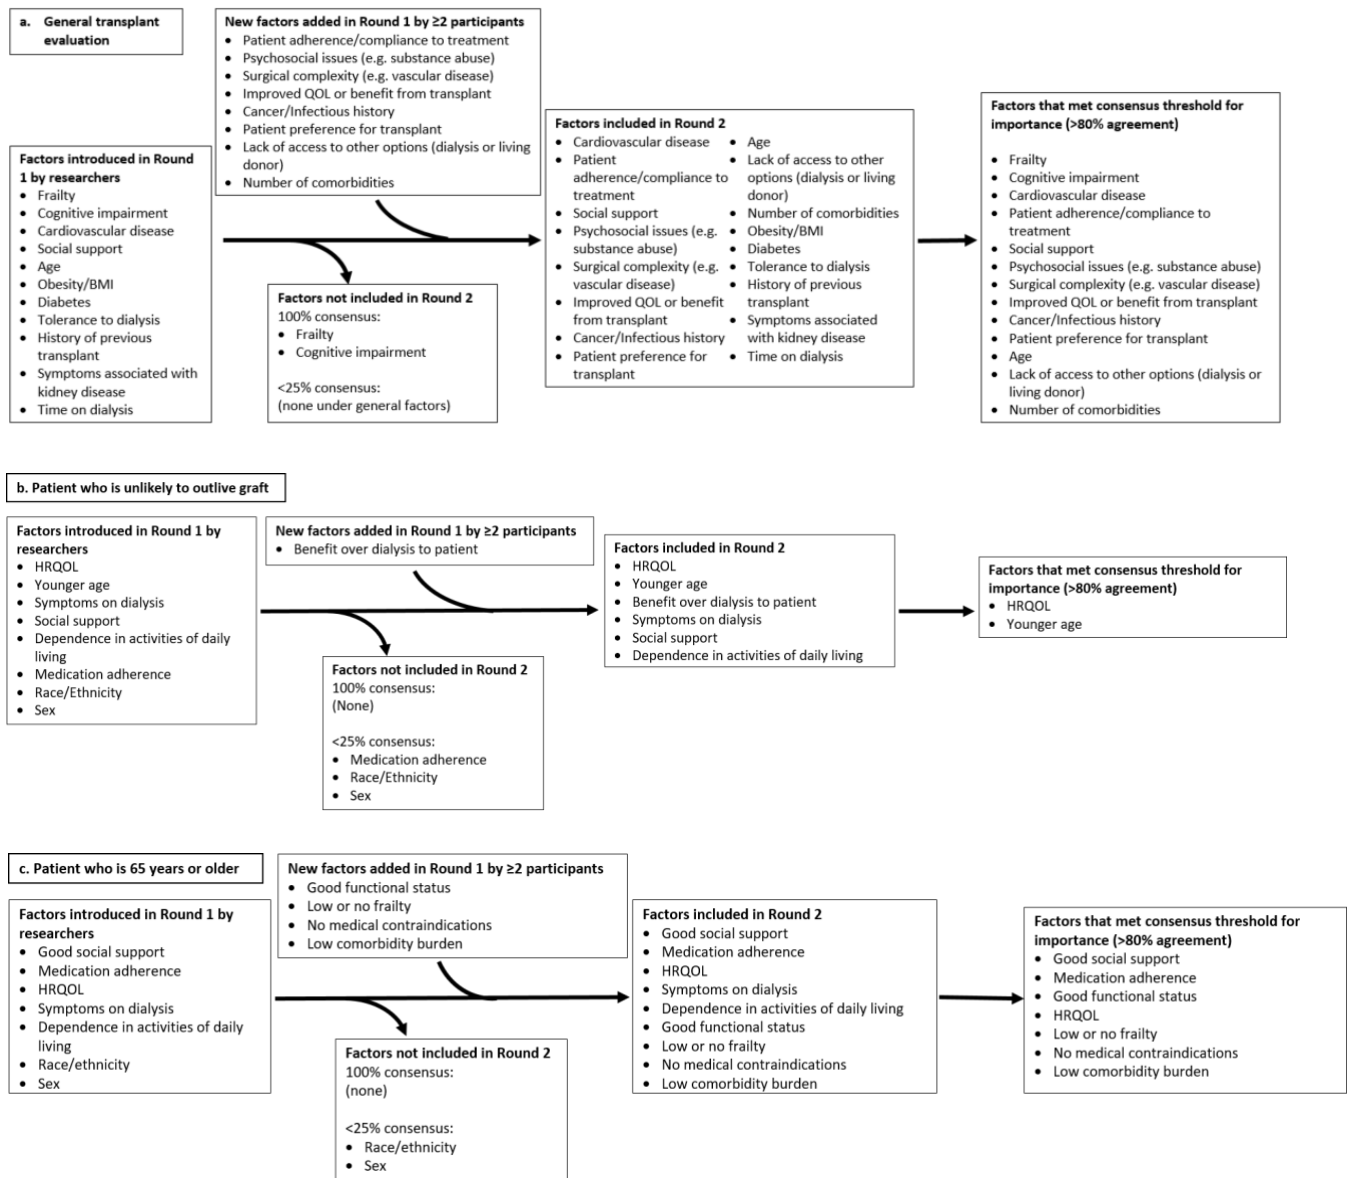

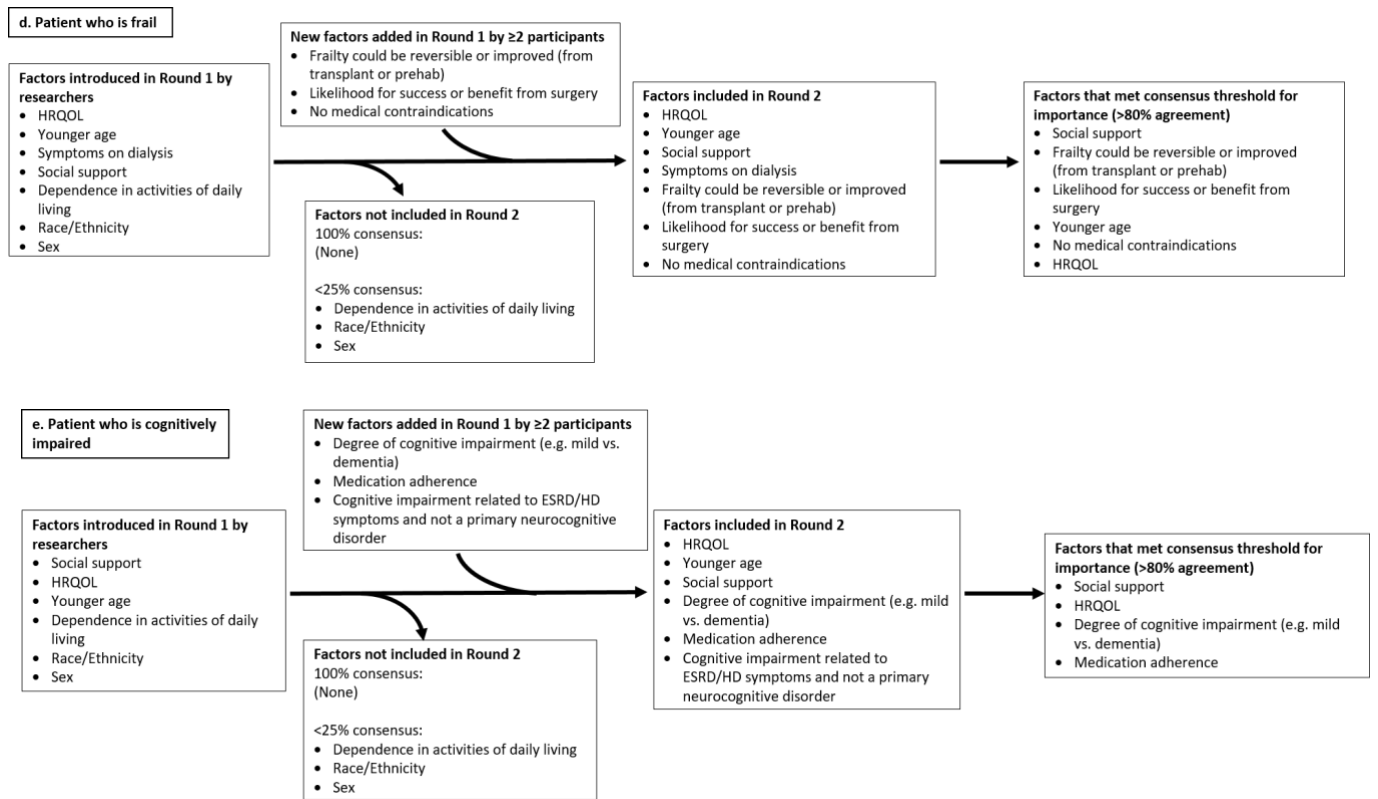

**Appendix 1. Round 1 survey instrument.**

**Delphi Clinician Survey Round 1**

Throughout this Delphi panel, we will send you up to four surveys about ethical issues in the transplantation of older, frail, or cognitively impaired adults.

This first survey aims to assess clinicians’ perspectives on if and when frailty and cognitive function should be used as candidate eligibility criteria for kidney transplantation.

Your completion of this survey will serve as your consent to participate in this research study.

| Survey Questions               | Response Format | Response Options                                                                                                                                                                                                                                      |
|--------------------------------|-----------------|-------------------------------------------------------------------------------------------------------------------------------------------------------------------------------------------------------------------------------------------------------|
| <b>Participant Background</b>  |                 |                                                                                                                                                                                                                                                       |
| 1. What is your clinical role? | Select one      | <ul style="list-style-type: none"> <li>a. Transplant Nephrologist</li> <li>b. Transplant Surgeon</li> <li>c. Transplant Coordinator</li> <li>d. Nurse/PA/NP</li> <li>e. Pharmacist</li> <li>f. Social Worker</li> <li>g. Other (open text)</li> </ul> |

|                                                                                                                         |                                       |                                                                                                                                                                                                                                                                                                                               |
|-------------------------------------------------------------------------------------------------------------------------|---------------------------------------|-------------------------------------------------------------------------------------------------------------------------------------------------------------------------------------------------------------------------------------------------------------------------------------------------------------------------------|
|                                                                                                                         |                                       |                                                                                                                                                                                                                                                                                                                               |
| 2. What is your center's OPTN code (e.g., MDJH)?                                                                        | Dropdown                              | 4 digit OPTN Code                                                                                                                                                                                                                                                                                                             |
| 3. How many years have you been practicing as a transplant clinician?                                                   | Select one                            | a. <5 years<br>b. 5-14 years<br>c. 15-24 years<br>d. ≥25 years                                                                                                                                                                                                                                                                |
| 4. What is your sex?                                                                                                    | Select one                            | a. Female<br>b. Male                                                                                                                                                                                                                                                                                                          |
| 5. What is your gender?                                                                                                 | Select one                            | a. Woman<br>b. Man<br>c. Transgender<br>d. Non-binary/non-conforming<br>e. Prefer not to say                                                                                                                                                                                                                                  |
| 6. How familiar are you with the published literature on frailty among transplant candidates and recipients?            | Select one                            | a. Very familiar<br>b. Familiar<br>c. Unfamiliar<br>d. Very unfamiliar                                                                                                                                                                                                                                                        |
| 7. How familiar are you with the published literature on cognitive function among transplant candidates and recipients? | Select one                            | a. Very familiar<br>b. Familiar<br>c. Unfamiliar<br>d. Very unfamiliar                                                                                                                                                                                                                                                        |
| Frailty and Cognitive Function Practices                                                                                |                                       |                                                                                                                                                                                                                                                                                                                               |
| 8. How often do you measure frailty at your center during transplant evaluation?                                        | Multiple choice; free text if (b)     | a. Always<br>b. Sometimes (Please explain)<br>c. Never<br>d. Not sure                                                                                                                                                                                                                                                         |
| 9. If Always or Sometimes to Q8: What frailty assessment tool(s) do you currently use? Mark all that apply.             | Mark all that apply; free text if (v) | a. Timed walk (i.e. 6-minute walk test)<br>b. Body mass index to quantify wasting<br>c. Functional status (i.e. KDQOL, SF-36, or PCS)<br>d. Stair climbing assessment<br>e. Timed up and go<br>f. Number of hospitalizations in the previous year<br>g. Distance walk (i.e. 10-meter walk test)<br>h. Fried frailty phenotype |

|                                                                                                                 |                              |                                                                                                                                                                                                                                                                                                                                                                                                                                                                                                                                                                                                                                                                     |
|-----------------------------------------------------------------------------------------------------------------|------------------------------|---------------------------------------------------------------------------------------------------------------------------------------------------------------------------------------------------------------------------------------------------------------------------------------------------------------------------------------------------------------------------------------------------------------------------------------------------------------------------------------------------------------------------------------------------------------------------------------------------------------------------------------------------------------------|
|                                                                                                                 |                              | <ul style="list-style-type: none"> <li>i. Montreal Cognitive Assessment (MoCA)</li> <li>j. Level of sarcopenia</li> <li>k. Cognitive function (i.e. 3MS, MMSE, or Trail Making Test)</li> <li>l. Short physical performance battery</li> <li>m. Geriatric assessment</li> <li>n. Frailty/Vigor assessment</li> <li>o. Deficit Index (DAI, also called Frailty Index)</li> <li>p. Gill Frailty Measure</li> <li>q. Brief Frailty Instrument</li> <li>r. Vulnerable Elders Survey</li> <li>s. FRAIL scale</li> <li>t. Rockwood clinical frailty scale</li> <li>u. Winograd screening instrument</li> <li>v. Other (please describe)</li> <li>w. Don't know</li> </ul> |
| 10. If yes to Q8: Do you use age to determine when to start measuring patients' frailty status?                 | Select one; free text if (a) | <ul style="list-style-type: none"> <li>a. Yes: At what age do you start measuring patients' frailty status?</li> <li>b. No</li> </ul>                                                                                                                                                                                                                                                                                                                                                                                                                                                                                                                               |
| 11. How often do you measure cognitive function at your center during transplant evaluation?                    | Select one; free text if (b) | <ul style="list-style-type: none"> <li>a. Always</li> <li>b. Sometimes (please explain)</li> <li>c. Never</li> <li>d. Not sure</li> </ul>                                                                                                                                                                                                                                                                                                                                                                                                                                                                                                                           |
| 12. If Always or Sometimes to Q11: What cognitive assessment tool(s) do you currently use? Mark all that apply. | Select one; free text if (f) | <ul style="list-style-type: none"> <li>a. Montreal Cognitive Assessment (MoCA)</li> <li>b. Mini Mental State Exam (MMSE)</li> <li>c. Modified Mini Mental State Test (3MS)</li> <li>d. Trail making test A or B</li> <li>e. Self-reported (or proxy reported) cognitive function</li> <li>f. Other (Please describe)</li> <li>e. Don't know</li> </ul>                                                                                                                                                                                                                                                                                                              |



|                                                                                                    |                              |                                                                                 |
|----------------------------------------------------------------------------------------------------|------------------------------|---------------------------------------------------------------------------------|
| 13. If yes to Q11: Do you use age to determine when to start measuring patients' cognitive status? | Select one; free text if (a) | a. Yes: At what age do you start measuring patients' cognitive status?<br>b. No |
|----------------------------------------------------------------------------------------------------|------------------------------|---------------------------------------------------------------------------------|

**Factors for clinical decision making**

In your opinion, please rate the following patient factors in terms of importance for deciding whether or not to add a patient to the kidney transplant waitlist.

|                                                        |            |                                                                                                                  |
|--------------------------------------------------------|------------|------------------------------------------------------------------------------------------------------------------|
| Age                                                    | Select one | a. Very Unimportant<br>b. Unimportant<br>c. No opinion<br>d. Important<br>e. Very Important<br>f. Not applicable |
| Cognitive impairment                                   | Select one | a. Very Unimportant<br>b. Unimportant<br>c. No opinion<br>d. Important<br>e. Very Important<br>f. Not applicable |
| Cardiovascular disease                                 | Select one | a. Very Unimportant<br>b. Unimportant<br>c. No opinion<br>d. Important<br>e. Very Important<br>f. Not applicable |
| Diabetes                                               | Select one | a. Very Unimportant<br>b. Unimportant<br>c. No opinion<br>d. Important<br>e. Very Important<br>f. Not applicable |
| Frailty                                                | Select one | a. Very Unimportant<br>b. Unimportant<br>c. No opinion<br>d. Important<br>e. Very Important<br>f. Not applicable |
| Obesity/Body Mass Index (e.g. $\geq 30\text{kg/m}^2$ ) | Select one | a. Very Unimportant<br>b. Unimportant<br>c. No opinion<br>d. Important<br>e. Very Important<br>f. Not applicable |
| Social support                                         | Select one | a. Very Unimportant<br>b. Unimportant<br>c. No opinion                                                           |

|                                                                                                                                         |            |                                                                                                                                                                                                  |
|-----------------------------------------------------------------------------------------------------------------------------------------|------------|--------------------------------------------------------------------------------------------------------------------------------------------------------------------------------------------------|
|                                                                                                                                         |            | <ul style="list-style-type: none"> <li>d. Important</li> <li>e. Very Important</li> <li>f. Not applicable</li> </ul>                                                                             |
| Tolerance to dialysis                                                                                                                   | Select one | <ul style="list-style-type: none"> <li>a. Very Unimportant</li> <li>b. Unimportant</li> <li>c. No opinion</li> <li>d. Important</li> <li>e. Very Important</li> <li>f. Not applicable</li> </ul> |
| Time on dialysis                                                                                                                        | Select one | <ul style="list-style-type: none"> <li>a. Very Unimportant</li> <li>b. Unimportant</li> <li>c. No opinion</li> <li>d. Important</li> <li>e. Very Important</li> <li>b. Not applicable</li> </ul> |
| History of previous transplant                                                                                                          | Select one | <ul style="list-style-type: none"> <li>a. Very Unimportant</li> <li>b. Unimportant</li> <li>c. No opinion</li> <li>d. Important</li> <li>e. Very Important</li> <li>f. Not applicable</li> </ul> |
| Symptoms associated with end stage kidney disease                                                                                       | Select one | <ul style="list-style-type: none"> <li>a. Very Unimportant</li> <li>b. Unimportant</li> <li>c. No opinion</li> <li>d. Important</li> <li>e. Very Important</li> <li>Not applicable</li> </ul>    |
| 14. What other factors, not listed above, are important for deciding whether or not to add a patient to the kidney transplant waitlist? | Open text  |                                                                                                                                                                                                  |

### **Ethical Considerations**

As you may be aware, only about a quarter of patients on the kidney transplant waiting list received a transplant in 2018 and only about half of deceased donor transplant recipients survive for 10 or more years.

Patients who are frail and/or cognitively impaired generally have less access to transplantation, and have worse post-transplant outcomes than their non-frail or non-cognitively impaired peers. However, frail and/or cognitively impaired patients do benefit from transplantation, including improvements in: functional status, health-related quality of life, and cognitive function. Further, frailty and cognitive impairment are not specific to older patients. Younger patients with kidney failure also experience a high burden of frailty and cognitive impairment.

We're interested in which factors should influence who has access to the transplant waitlist.

|                                                                                                                                                 |                                                     |                                                                                                                                                                                                                                                                                                                                                                                                                                                         |
|-------------------------------------------------------------------------------------------------------------------------------------------------|-----------------------------------------------------|---------------------------------------------------------------------------------------------------------------------------------------------------------------------------------------------------------------------------------------------------------------------------------------------------------------------------------------------------------------------------------------------------------------------------------------------------------|
| <p>15. How much do you agree with the following statement?</p> <p>It is appropriate to list a patient who is unlikely to outlive the graft.</p> | <p>Select one</p>                                   | <ul style="list-style-type: none"> <li>a. Strongly Agree</li> <li>b. Agree</li> <li>c. Undecided</li> <li>d. Disagree</li> <li>e. Strongly Disagree</li> </ul>                                                                                                                                                                                                                                                                                          |
| <p>16. What factors would cause you to list a patient who is unlikely to outlive a graft for a transplant? [mark all that apply]</p>            | <p>Mark all that apply; free text if (i) or (j)</p> | <ul style="list-style-type: none"> <li>a. Younger age</li> <li>b. Race/Ethnicity</li> <li>c. Sex</li> <li>d. Social support</li> <li>e. Medication adherence</li> <li>f. Symptoms on dialysis</li> <li>g. Health-related quality of life</li> <li>h. Dependence in activities of daily living</li> <li>i. Other [free text]</li> <li>j. I would never list a patient who is unlikely to outlive a graft for transplantation (please explain)</li> </ul> |
| <p>17. How much do you agree with the following statements?</p> <p>It is appropriate to list a patient who is 65 years or older.</p>            | <p>Select one</p>                                   | <ul style="list-style-type: none"> <li>a. Strongly Agree</li> <li>b. Agree</li> <li>c. Undecided</li> <li>d. Disagree</li> <li>e. Strongly Disagree</li> </ul>                                                                                                                                                                                                                                                                                          |
| <p>18. What factors would cause you to list a patient who is 65 years or older for a transplant? [mark all that apply]</p>                      | <p>Mark all that apply; free text if (h) or (i)</p> | <ul style="list-style-type: none"> <li>a. Race/ethnicity</li> <li>b. Sex</li> <li>c. Good social support</li> <li>d. Medication adherence</li> <li>e. Symptoms on dialysis</li> <li>f. Health-related quality of life</li> <li>g. Dependence in activities of daily living</li> <li>h. Other [free text]</li> <li>i. I would never list a patient who is 65 years or older for transplantation (please explain)</li> <li>b.</li> </ul>                  |
| <p>19. How much do you agree with the following statement?</p> <p>It is appropriate to list a patient who is frail.</p>                         | <p>Select one</p>                                   | <ul style="list-style-type: none"> <li>a. Strongly Agree</li> <li>b. Agree</li> <li>c. Undecided</li> <li>d. Disagree</li> <li>e. Strongly Disagree</li> </ul>                                                                                                                                                                                                                                                                                          |

|                                                                                                                                                                                                                                                                                                  |                                                     |                                                                                                                                                                                                                                                                                                                                                                                                                                        |
|--------------------------------------------------------------------------------------------------------------------------------------------------------------------------------------------------------------------------------------------------------------------------------------------------|-----------------------------------------------------|----------------------------------------------------------------------------------------------------------------------------------------------------------------------------------------------------------------------------------------------------------------------------------------------------------------------------------------------------------------------------------------------------------------------------------------|
| <p>20. What factors would cause you to list a frail patient for a transplant? [mark all that apply]</p>                                                                                                                                                                                          | <p>Mark all that apply; free text if (i) or (j)</p> | <ul style="list-style-type: none"> <li>a. Race/ethnicity</li> <li>b. Sex</li> <li>c. Social support</li> <li>d. Younger age</li> <li>e. Medication adherence</li> <li>f. Symptoms on dialysis</li> <li>g. Health-related quality of life</li> <li>h. Dependence in activities of daily living</li> <li>i. Other [free text]</li> <li>j. I would never list a frail patient for a transplant (please explain)</li> </ul>                |
| <p>21. How much do you agree with the following statement?</p> <p>It is appropriate to list a patient who is cognitively impaired.</p>                                                                                                                                                           | <p>Select one</p>                                   | <ul style="list-style-type: none"> <li>a. Strongly Agree</li> <li>b. Agree</li> <li>c. Undecided</li> <li>d. Disagree</li> <li>e. Strongly Disagree</li> </ul>                                                                                                                                                                                                                                                                         |
| <p>22. What factors would cause you to list a cognitively impaired patient for a transplant? [mark all that apply]</p>                                                                                                                                                                           | <p>Mark all that apply; free text if (i) or (j)</p> | <ul style="list-style-type: none"> <li>a. Race/ethnicity</li> <li>b. Sex</li> <li>c. Social support</li> <li>d. Younger age</li> <li>e. Medication adherence</li> <li>f. Symptoms on dialysis</li> <li>g. Health-related quality of life</li> <li>h. Dependence in activities of daily living</li> <li>i. Other [free text]</li> <li>j. I would never list a cognitively impaired patient for a transplant (please explain)</li> </ul> |
| <p>23. Some clinicians believe that organs should be allocated to patients who will live for a long time with the organ. Doing so would give younger, physically healthy, and cognitively intact people an advantage. In your opinion, is this organ allocation approach fair? Why? Why not?</p> | <p>Free text</p>                                    |                                                                                                                                                                                                                                                                                                                                                                                                                                        |

**Appendix 2.** Round 2 survey instrument.

1. **100% of your peers rated cognitive impairment and frailty very important or important.**  
**Please rate the following factors to consider in terms of importance for kidney transplant evaluation in terms of importance:**

| <b>Factor for kidney transplant evaluation</b> | <b>Average rating from your peers (out of 5)</b> | <b>% of your peers who rated this factor very important/important</b> | <b>Your new rating</b>                                                                                           |
|------------------------------------------------|--------------------------------------------------|-----------------------------------------------------------------------|------------------------------------------------------------------------------------------------------------------|
| CVD                                            | 4.48                                             | 96%                                                                   | 1. Very Unimportant<br>2. Unimportant<br>3. No opinion<br>4. Important<br>5. Very Important<br>6. Not applicable |
| Social Support                                 | 4.4                                              | 88%                                                                   | 1. Very Unimportant<br>2. Unimportant<br>3. No opinion<br>4. Important<br>5. Very Important<br>6. Not applicable |
| Age                                            | 3.78                                             | 80%                                                                   | 1. Very Unimportant<br>2. Unimportant<br>3. No opinion<br>4. Important<br>5. Very Important<br>6. Not applicable |
| Diabetes                                       | 3.52                                             | 68%                                                                   | 1. Very Unimportant<br>2. Unimportant<br>3. No opinion<br>4. Important<br>5. Very Important<br>6. Not applicable |
| Obesity/BMI                                    | 3.48                                             | 68%                                                                   | 1. Very Unimportant<br>2. Unimportant<br>3. No opinion<br>4. Important<br>5. Very Important<br>6. Not applicable |
| Tolerance to dialysis                          | 3.08                                             | 48%                                                                   | 1. Very Unimportant                                                                                              |

|                                                   |      |     |                                                                                                                                                                                                  |
|---------------------------------------------------|------|-----|--------------------------------------------------------------------------------------------------------------------------------------------------------------------------------------------------|
|                                                   |      |     | <ol style="list-style-type: none"> <li>2. Unimportant</li> <li>3. No opinion</li> <li>4. Important</li> <li>5. Very Important</li> <li>6. Not applicable</li> </ol>                              |
| History of previous transplant                    | 3.08 | 44% | <ol style="list-style-type: none"> <li>1. Very Unimportant</li> <li>2. Unimportant</li> <li>3. No opinion</li> <li>4. Important</li> <li>5. Very Important</li> <li>6. Not applicable</li> </ol> |
| Symptoms associated with end stage kidney disease | 2.92 | 40% | <ol style="list-style-type: none"> <li>1. Very Unimportant</li> <li>2. Unimportant</li> <li>3. No opinion</li> <li>4. Important</li> <li>5. Very Important</li> <li>6. Not applicable</li> </ol> |
| Time on dialysis                                  | 2.76 | 36% | <ol style="list-style-type: none"> <li>1. Very Unimportant</li> <li>2. Unimportant</li> <li>3. No opinion</li> <li>4. Important</li> <li>5. Very Important</li> <li>6. Not applicable</li> </ol> |

2. Your peers identified additional factors in the first round of this delphi study that may or may not be important to consider for kidney evaluation. **In your opinion**, please rate the following patient factors in terms of importance for deciding whether or not to add a patient to the kidney transplant waitlist.

| <b>Patient Factors</b>                           |                                                                                                                                                                                                     |
|--------------------------------------------------|-----------------------------------------------------------------------------------------------------------------------------------------------------------------------------------------------------|
| ii. Patient adherence/compliance                 | <ol style="list-style-type: none"> <li>7. Very Unimportant</li> <li>8. Unimportant</li> <li>9. No opinion</li> <li>10. Important</li> <li>11. Very Important</li> <li>12. Not applicable</li> </ol> |
| iii. Surgical complexity (e.g. vascular disease) | <ol style="list-style-type: none"> <li>1. Very Unimportant</li> <li>2. Unimportant</li> <li>3. No opinion</li> <li>4. Important</li> <li>5. Very Important</li> <li>6. Not applicable</li> </ol>    |
| iv. Psychosocial issues (e.g. substance abuse)   | <ol style="list-style-type: none"> <li>1. Very Unimportant</li> <li>2. Unimportant</li> <li>3. No opinion</li> </ol>                                                                                |

|                                                                |                                                                                                                  |
|----------------------------------------------------------------|------------------------------------------------------------------------------------------------------------------|
|                                                                | 4. Important<br>5. Very Important<br>6. Not applicable                                                           |
| v. Improved QOL or benefit from transplant                     | 1. Very Unimportant<br>2. Unimportant<br>3. No opinion<br>4. Important<br>5. Very Important<br>6. Not applicable |
| vi. Number of comorbidities                                    | 1. Very Unimportant<br>2. Unimportant<br>3. No opinion<br>4. Important<br>5. Very Important<br>6. Not applicable |
| vii. Cancer/Infectious history                                 | 1. Very Unimportant<br>2. Unimportant<br>3. No opinion<br>4. Important<br>5. Very Important<br>6. Not applicable |
| viii. Patient decision                                         | 1. Very Unimportant<br>2. Unimportant<br>3. No opinion<br>4. Important<br>5. Very Important<br>6. Not applicable |
| ix. Lack of access to other options (dialysis or living donor) | 1. Very Unimportant<br>2. Unimportant<br>3. No opinion<br>4. Important<br>5. Very Important<br>6. Not applicable |

3. **72% of your peers strongly agreed/agreed that it is appropriate to list a patient who is unlikely to outlive the graft.**

**Imagine you are evaluating a kidney transplant candidate that is unlikely to outlive the graft. Please rate the factors that would cause you to list a patient who is unlikely to outlive a graft for a transplant in terms of importance:**

| Factor | % of your peers who said these factors would cause them to list | Your rating on the order of importance |
|--------|-----------------------------------------------------------------|----------------------------------------|
|--------|-----------------------------------------------------------------|----------------------------------------|

|                                          | <b>a patient who is unlikely to outlive a graft</b> |                                                                                                                  |
|------------------------------------------|-----------------------------------------------------|------------------------------------------------------------------------------------------------------------------|
| Younger age                              | 72%                                                 | 1. Very Unimportant<br>2. Unimportant<br>3. No opinion<br>4. Important<br>5. Very Important<br>6. Not applicable |
| Health-related quality of life           | 76%                                                 | 1. Very Unimportant<br>2. Unimportant<br>3. No opinion<br>4. Important<br>5. Very Important<br>6. Not applicable |
| Social Support                           | 36%                                                 | 1. Very Unimportant<br>2. Unimportant<br>3. No opinion<br>4. Important<br>5. Very Important<br>6. Not applicable |
| Symptoms on dialysis                     | 52%                                                 | 1. Very Unimportant<br>2. Unimportant<br>3. No opinion<br>4. Important<br>5. Very Important<br>6. Not applicable |
| Dependence in activities of daily living | 28%                                                 | 1. Very Unimportant<br>2. Unimportant<br>3. No opinion<br>4. Important<br>5. Very Important<br>6. Not applicable |
| Benefit over dialysis to patient         | New factor added by participants in round 1         | 1. Very Unimportant<br>2. Unimportant<br>3. No opinion<br>4. Important<br>5. Very Important<br>6. Not applicable |

4. **96% of your peers strongly agreed/agreed that it is appropriate to list a patient who is 65 years or older.**

**Imagine you are evaluating a kidney transplant candidate who is 65 years or older. Please rate the following factors in terms of importance:**



| Factor                                   | % of your peers who said these factors would cause them to list a patient who is 65 years or older | Your Ranking                                                                                                                                                                                     |
|------------------------------------------|----------------------------------------------------------------------------------------------------|--------------------------------------------------------------------------------------------------------------------------------------------------------------------------------------------------|
| Health-related quality of life           | 76%                                                                                                | <ol style="list-style-type: none"> <li>1. Very Unimportant</li> <li>2. Unimportant</li> <li>3. No opinion</li> <li>4. Important</li> <li>5. Very Important</li> <li>6. Not applicable</li> </ol> |
| Good Social Support                      | 72%                                                                                                | <ol style="list-style-type: none"> <li>1. Very Unimportant</li> <li>2. Unimportant</li> <li>3. No opinion</li> <li>4. Important</li> <li>5. Very Important</li> <li>6. Not applicable</li> </ol> |
| Medication adherence                     | 64%                                                                                                | <ol style="list-style-type: none"> <li>1. Very Unimportant</li> <li>2. Unimportant</li> <li>3. No opinion</li> <li>4. Important</li> <li>5. Very Important</li> <li>6. Not applicable</li> </ol> |
| Symptoms on dialysis                     | 44%                                                                                                | <ol style="list-style-type: none"> <li>1. Very Unimportant</li> <li>2. Unimportant</li> <li>3. No opinion</li> <li>4. Important</li> <li>5. Very Important</li> <li>6. Not applicable</li> </ol> |
| Dependence in activities of daily living | 28%                                                                                                | <ol style="list-style-type: none"> <li>1. Very Unimportant</li> <li>2. Unimportant</li> <li>3. No opinion</li> <li>4. Important</li> <li>5. Very Important</li> <li>6. Not applicable</li> </ol> |
| Low/No Frailty                           | New factor added by participant                                                                    | <ol style="list-style-type: none"> <li>1. Very Unimportant</li> <li>2. Unimportant</li> <li>3. No opinion</li> <li>4. Important</li> <li>5. Very Important</li> <li>6. Not applicable</li> </ol> |

|                              |                                 |                                                                                                                                                                                                  |
|------------------------------|---------------------------------|--------------------------------------------------------------------------------------------------------------------------------------------------------------------------------------------------|
| High Physical activity       | New factor added by participant | <ol style="list-style-type: none"> <li>1. Very Unimportant</li> <li>2. Unimportant</li> <li>3. No opinion</li> <li>4. Important</li> <li>5. Very Important</li> <li>6. Not applicable</li> </ol> |
| No medical contraindications | New factor added by participant | <ol style="list-style-type: none"> <li>1. Very Unimportant</li> <li>2. Unimportant</li> <li>3. No opinion</li> <li>4. Important</li> <li>5. Very Important</li> <li>6. Not applicable</li> </ol> |
| Good functional status       | New factor added by participant | <ol style="list-style-type: none"> <li>1. Very Unimportant</li> <li>2. Unimportant</li> <li>3. No opinion</li> <li>4. Important</li> <li>5. Very Important</li> <li>6. Not applicable</li> </ol> |
| Low comorbidity burden       | New factor added by participant | <ol style="list-style-type: none"> <li>1. Very Unimportant</li> <li>2. Unimportant</li> <li>3. No opinion</li> <li>4. Important</li> <li>5. Very Important</li> <li>6. Not applicable</li> </ol> |

5. **72% of your peers strongly agreed/agreed that it is appropriate to list a transplant candidate who is frail.**

**Imagine you are evaluating a kidney transplant candidate who is frail. Please rate the following factors in terms of importance:**

| <b>Factor</b>                  | <b>% of your peers who said these factors would cause them to list a patient who is frail</b> | <b>Your Rating</b>                                                                                                                                                                               |
|--------------------------------|-----------------------------------------------------------------------------------------------|--------------------------------------------------------------------------------------------------------------------------------------------------------------------------------------------------|
| Younger age                    | 64%                                                                                           | <ol style="list-style-type: none"> <li>1. Very Unimportant</li> <li>2. Unimportant</li> <li>3. No opinion</li> <li>4. Important</li> <li>5. Very Important</li> <li>6. Not applicable</li> </ol> |
| Health-related quality of life | 64%                                                                                           | <ol style="list-style-type: none"> <li>1. Very Unimportant</li> </ol>                                                                                                                            |

|                                                                  |                                 |                                                                                                                  |
|------------------------------------------------------------------|---------------------------------|------------------------------------------------------------------------------------------------------------------|
|                                                                  |                                 | 2. Unimportant<br>3. No opinion<br>4. Important<br>5. Very Important<br>6. Not applicable                        |
| Social Support                                                   | 52%                             | 1. Very Unimportant<br>2. Unimportant<br>3. No opinion<br>4. Important<br>5. Very Important<br>6. Not applicable |
| Symptoms on dialysis                                             | 48%                             | 1. Very Unimportant<br>2. Unimportant<br>3. No opinion<br>4. Important<br>5. Very Important<br>6. Not applicable |
| Frailty could be reversible/improved (from transplant or prehab) | New factor added by participant | 1. Very Unimportant<br>2. Unimportant<br>3. No opinion<br>4. Important<br>5. Very Important<br>6. Not applicable |
| No medical contraindications                                     | New factor added by participant | 1. Very Unimportant<br>2. Unimportant<br>3. No opinion<br>4. Important<br>5. Very Important<br>6. Not applicable |
| Likelihood for success/benefit from surgery                      | New factor added by participant | 1. Very Unimportant<br>2. Unimportant<br>3. No opinion<br>4. Important<br>5. Very Important<br>6. Not applicable |

6. **68% of your peers strongly agreed/agreed that it is appropriate to list a transplant candidate who is cognitively impaired.**

**Imagine you are evaluating a kidney transplant candidate who has cognitive impairment. Please rate the following factors in terms of importance:**

| <b>Factor</b>                                                                              | <b>% of your peers who said these factors would cause them to list a patient who is frail</b> | <b>Your Rating</b>                                                                                               |
|--------------------------------------------------------------------------------------------|-----------------------------------------------------------------------------------------------|------------------------------------------------------------------------------------------------------------------|
| Social Support                                                                             | 72%                                                                                           | 1. Very Unimportant<br>2. Unimportant<br>3. No opinion<br>4. Important<br>5. Very Important<br>6. Not applicable |
| Health-related quality of life                                                             | 60%                                                                                           | 1. Very Unimportant<br>2. Unimportant<br>3. No opinion<br>4. Important<br>5. Very Important<br>6. Not applicable |
| Younger age                                                                                | 40%                                                                                           | 1. Very Unimportant<br>2. Unimportant<br>3. No opinion<br>4. Important<br>5. Very Important<br>6. Not applicable |
| Symptoms on dialysis                                                                       | 28%                                                                                           | 1. Very Unimportant<br>2. Unimportant<br>3. No opinion<br>4. Important<br>5. Very Important<br>6. Not applicable |
| Degree of cognitive impairment (e.g. mild vs. dementia)                                    | New factor added by participant                                                               | 1. Very Unimportant<br>2. Unimportant<br>3. No opinion<br>4. Important<br>5. Very Important<br>6. Not applicable |
| Cognitive impairment related to ESRD/HD symptoms and not a primary neurocognitive disorder | New factor added by participant                                                               | 1. Very Unimportant<br>2. Unimportant<br>3. No opinion<br>4. Important<br>5. Very Important<br>6. Not applicable |
| Medication adherence                                                                       | New factor added by participant                                                               | 1. Very Unimportant<br>2. Unimportant<br>3. No opinion                                                           |

|  |  |                                                        |
|--|--|--------------------------------------------------------|
|  |  | 4. Important<br>5. Very Important<br>6. Not applicable |
|--|--|--------------------------------------------------------|
